# Supplementary material for: Combination of OipA, BabA, and SabA as candidate biomarkers for predicting Helicobacter pylori-related gastric cancer
Source: PubMed Central journal article supplement (PMC5098209; doi:10.1038/srep36442), 2016-11-07
Supplement: srep36442-s1.pdf [file srep36442-s1.pdf]

# **Combination of OipA, BabA, and SabA as candidate biomarkers for predicting *Helicobacter pylori*-related gastric cancer**

**Yu-Lin Su<sup>1</sup>, Hsiang-Ling Huang<sup>1</sup>, Bo-Shih Huang<sup>1</sup>, Po-Chung Chen<sup>2</sup>, Chien-Sheng Chen<sup>2</sup>, Hong-Long Wang<sup>3</sup>, Pin-Hsin Lin<sup>1</sup>, Meng-Shu Chieh<sup>4</sup>, Jiunn-Jong Wu<sup>5</sup>, Jyh-Chin Yang<sup>6\*</sup>, and Lu-Ping Chow<sup>1,7\*</sup>**

<sup>1</sup>Graduate Institute of Biochemistry and Molecular Biology, College of Medicine, National Taiwan University, Taipei, Taiwan; <sup>2</sup>Graduate Institute of Systems Biology and Bioinformatics, National Central University, Taoyuan, Taiwan; <sup>3</sup>Department of Statistics, National Taipei University, New Taipei City, Taiwan; <sup>4</sup>First Core Laboratory, College of Medicine, National Taiwan University, Taipei, Taiwan; <sup>5</sup>Department of Medical Laboratory Science and Biotechnology, Center of Infectious Disease and Signaling Research, College of Medicine, National Cheng Kung University, Tainan, Taiwan; <sup>6</sup>Department of Internal Medicine, Hospital and College of Medicine, National Taiwan University, Taipei, Taiwan; <sup>7</sup>Center of Genomic Medicine, National Taiwan University, Taipei, Taiwan.

\*\*Address correspondence to Dr. Lu-Ping Chow, Graduate Institute of Biochemistry and Molecular Biology, College of Medicine, National Taiwan University, No. 1, Sec. 1, Jen-Ai Rd., Taipei 100, Taiwan. Tel: +(886)-2-23123456, ext. 88214. Fax: +(886)-2-23958814. E-mail address: [chowip@ntu.edu.tw](mailto:chowip@ntu.edu.tw) or Dr. Jyh-Chin Yang, Department of Internal Medicine, Hospital and College of Medicine, National Taiwan University, No. 7, Chung-Shan South Rd., Taipei 100, Taiwan. Tel: +(886)-2-23123456, ext.65055. E-mail: [jcyang47@ntu.edu.tw](mailto:jcyang47@ntu.edu.tw).

## **Supplemental Method**

### ***Molecular genotyping by sequencing***

The genomic DNA of GC *H. pylori* stains (n=5) were extracted and OipA, BabA and SabA genes were amplified by PCR as templates for cycle sequencing with BigDye® Terminator v3.1 Cycle Sequencing Kit (Thermo Fisher Scientific). The extension products were analyzed by capillary electrophoresis using an ABI 3730 x1 DNA sequencer (Applied Biosystems, Foster City, CA). The primers used for sequencing are listed in Supplemental Table V. The nucleotide sequences were analyzed by ApE version 2.0 and BLAST system at the NCBI.

**Supplemental Table I.** Proteins upregulated (fold change > 1.5) in *H. pylori* strains from GC patients compared to DU patients

| <b>Accession number</b> | <b>Protein name<sup>a</sup></b>                                    | <b>Mascot score</b> | <b>Coverage (%)</b> | <b>Matched peptides</b> | <b>117/115 ratio<sup>b</sup></b> |
|-------------------------|--------------------------------------------------------------------|---------------------|---------------------|-------------------------|----------------------------------|
| 118596700               | <b>Adherence-associated lipoprotein A (AlpA)</b>                   | 74.44               | 10.64               | 6                       | 4.403                            |
| 188144165               | Hypothetical protein HPSH_05890                                    | 69.15               | 2.78                | 1                       | 3.902                            |
| 325997176               | Acylamide aminohydrolase                                           | 52.47               | 10.70               | 4                       | 2.905                            |
| 107837644               | Outer membrane protein (HorJ)                                      | 45.84               | 8.47                | 3                       | 2.766                            |
| 317182137               | Thioredoxin                                                        | 437.38              | 37.74               | 4                       | 2.656                            |
| 147667712               | <b>Cag pathogenicity island protein 1 (Cag1)</b>                   | 89.65               | 21.74               | 2                       | 2.525                            |
| 207108417               | Hypothetical protein HpylH_02130                                   | 50.22               | 8.43                | 2                       | 2.399                            |
| 15611194                | Bacterioferritin comigratory protein                               | 50.24               | 7.24                | 1                       | 2.379                            |
| 207110092               | Flagellar assembly protein (FliW)                                  | 45.18               | 26.92               | 1                       | 2.284                            |
| 317014107               | <b>N-methylhydantoinase (SerC)</b>                                 | 374.00              | 15.95               | 17                      | 2.208                            |
| 166865295               | Cytotoxin associated protein A                                     | 121.76              | 25.00               | 3                       | 2.165                            |
| 297379894               | Hydantoin utilization protein B (HyuB)                             | 459.10              | 18.95               | 20                      | 2.149                            |
| 315586631               | <b>Hydantoin utilization protein A (HyuA)</b>                      | 880.87              | 18.37               | 13                      | 2.123                            |
| 207093328               | Hypothetical protein HpylHP_11291                                  | 139.19              | 25.39               | 5                       | 2.047                            |
| 317010246               | <b>Ubiquinol cytochrome c oxidoreductase, cytochrome c1 (PetC)</b> | 82.32               | 17.89               | 5                       | 2.042                            |
| 315113175               | Chain A, solution structure of Slyd                                | 154.74              | 16.56               | 3                       | 2.021                            |
| 15645213                | <b>2-oxoglutarate:acceptor oxidoreductase (OorD)</b>               | 80.50               | 13.27               | 1                       | 2.008                            |
| 317181408               | Hypothetical protein HPF57_0118                                    | 73.89               | 7.04                | 4                       | 1.983                            |
| 15611698                | Hypothetical protein jhp0631                                       | 148.11              | 25.90               | 6                       | 1.921                            |
| 15612304                | <b>50S ribosomal protein L3 (RplC)</b>                             | 138.07              | 26.18               | 6                       | 1.905                            |
| 15611609                | Hypothetical protein jhp0542                                       | 52.97               | 7.35                | 4                       | 1.898                            |
| 315586681               | <b>Outer inflammatory protein (OipA)</b>                           | 40.07               | 5.92                | 2                       | 1.890                            |
| 188144314               | Conserved hypothetical secreted protein                            | 357.59              | 39.01               | 10                      | 1.873                            |

|           |                                                                           |        |       |    |       |
|-----------|---------------------------------------------------------------------------|--------|-------|----|-------|
| 317182005 | Acetyl coenzyme A acetyltransferase                                       | 136.26 | 20.20 | 6  | 1.850 |
| 107836198 | Hypothetical protein HPAG1_1536                                           | 323.62 | 33.60 | 10 | 1.849 |
| 317182811 | Hypothetical protein HPF57_1521                                           | 303.84 | 33.60 | 10 | 1.849 |
| 25808535  | <b>Inorganic pyrophosphatase (Ppa)</b>                                    | 45.53  | 10.40 | 3  | 1.847 |
| 207092998 | <b>Carbonic anhydrase (CA)</b>                                            | 25.02  | 4.96  | 2  | 1.846 |
| 15646105  | Unnamed protein product                                                   | 84.14  | 26.40 | 5  | 1.846 |
| 297379391 | Response regulator (OmpR)                                                 | 76.91  | 20.00 | 5  | 1.845 |
| 188143179 | Hypothetical protein HPSH_00680                                           | 69.04  | 50.00 | 2  | 1.844 |
| 317182706 | Putative outer membrane protein                                           | 58.51  | 4.04  | 2  | 1.839 |
| 317181400 | Hypothetical protein HPF57_0110                                           | 88.91  | 41.27 | 3  | 1.817 |
| 317015027 | Hypothetical protein HPGAM_08495                                          | 280.74 | 30.83 | 9  | 1.798 |
| 95117797  | Outer membrane protein (Omp22)                                            | 550.30 | 35.20 | 7  | 1.768 |
| 15645472  | Unnamed protein product                                                   | 31.50  | 3.00  | 2  | 1.765 |
| 317012238 | Translation initiation factor (IF-2)                                      | 117.26 | 10.36 | 10 | 1.740 |
| 207109410 | <b>Cytochrome c oxidase cbb3-type subunit II (FixO)</b>                   | 79.90  | 22.66 | 4  | 1.736 |
| 46251334  | Outer membrane protein                                                    | 339.21 | 33.33 | 5  | 1.730 |
| 127663933 | <b>Cag pathogenicity island protein 25 (CagC)</b>                         | 42.07  | 21.74 | 3  | 1.727 |
| 107837310 | Hypothetical protein HPAG1_1112                                           | 192.41 | 19.67 | 3  | 1.717 |
| 107836832 | <b>Aspartate ammonia-lyase (AspA)</b>                                     | 156.98 | 13.89 | 8  | 1.712 |
| 217033713 | Hypothetical protein HP9810_5g55                                          | 36.36  | 5.73  | 2  | 1.704 |
| 207109532 | <b>Replicative DNA helicase (DnaB)</b>                                    | 38.18  | 5.59  | 1  | 1.695 |
| 325996403 | <b>ATP synthase F0F1 subunit B (AtpF)</b>                                 | 56.13  | 17.91 | 3  | 1.690 |
| 107837708 | <b>Iron(III) ABC transporter, periplasmic iron-binding protein (CeuE)</b> | 178.01 | 19.70 | 8  | 1.683 |
| 307637404 | Hypothetical protein hp908_0728                                           | 122.25 | 14.38 | 2  | 1.683 |
| 207108785 | <b>50S ribosomal protein L13 (RplM)</b>                                   | 53.39  | 23.53 | 5  | 1.683 |
| 11321265  | <b>Gamma-glutamyltranspeptidase (Ggt)</b>                                 | 84.29  | 9.17  | 6  | 1.681 |

|           |                                                         |         |       |    |       |
|-----------|---------------------------------------------------------|---------|-------|----|-------|
| 207109162 | <b>DNA-directed RNA polymerase subunit omega (RpoZ)</b> | 42.47   | 32.88 | 3  | 1.676 |
| 188144468 | Hypothetical protein HPSH_07460                         | 249.33  | 16.19 | 3  | 1.675 |
| 15611420  | Copper-associated protein                               | 70.71   | 16.67 | 1  | 1.675 |
| 317010684 | <b>3-dehydroquinase dehydratase (AroD)</b>              | 62.57   | 10.78 | 1  | 1.674 |
| 110377354 | <b>Heat shock protein 60 (GroEL)</b>                    | 3425.88 | 77.11 | 42 | 1.665 |
| 208435298 | ATP/GTP binding protein                                 | 138.71  | 4.35  | 2  | 1.659 |
| 317177289 | Outer membrane protein (HofC)                           | 357.43  | 14.77 | 8  | 1.657 |
| 207092727 | ATP-binding protein (Mpr)                               | 38.35   | 21.32 | 3  | 1.655 |
| 15644733  | Unnamed protein product                                 | 416.82  | 18.76 | 10 | 1.653 |
| 107837702 | Translation elongation factor (EF-Ts)                   | 231.96  | 28.17 | 12 | 1.650 |
| 188143969 | <b>Acetate kinase (AckA)</b>                            | 36.68   | 5.24  | 4  | 1.646 |
| 712831    | Heat shock protein                                      | 2499.12 | 76.15 | 40 | 1.635 |
| 188144216 | <b>Aspartate-semialdehyde dehydrogenase (Asd)</b>       | 66.17   | 7.23  | 3  | 1.630 |
| 217034805 | Hypothetical protein HP9810_866g2                       | 360.08  | 40.13 | 7  | 1.622 |
| 317013097 | <b>30S ribosomal protein S17 (RpsQ)</b>                 | 68.83   | 24.42 | 4  | 1.621 |
| 15612352  | Rod shape-determining protein (MreB)                    | 129.06  | 11.82 | 3  | 1.615 |
| 317181264 | Hypothetical protein HPF32_1468                         | 188.68  | 25.23 | 11 | 1.612 |
| 317011348 | <b>Signal recognition particle protein (Ffh)</b>        | 83.67   | 6.92  | 3  | 1.608 |
| 317008739 | Urease accessory protein (UreH)                         | 42.01   | 7.92  | 2  | 1.603 |
| 15644849  | Unnamed protein product                                 | 73.05   | 15.95 | 6  | 1.603 |
| 207109368 | Biopolymer transport protein                            | 42.87   | 8.18  | 1  | 1.597 |
| 315587202 | <b>30S ribosomal protein S3 (RpsC)</b>                  | 148.34  | 33.76 | 13 | 1.593 |
| 207108543 | <b>Pyridoxal phosphate biosynthetic protein (PdxJ)</b>  | 55.12   | 8.85  | 3  | 1.590 |
| 107836475 | ATP-dependent nuclease                                  | 28.68   | 8.14  | 4  | 1.588 |
| 294662397 | Chain B, crystal structure of Ycei (Hp1286)             | 250.52  | 36.59 | 9  | 1.587 |
| 308062217 | <b>Blood group antigen binding adhesin (BabA)</b>       | 414.23  | 9.62  | 7  | 1.586 |

|           |                                                                     |        |       |    |       |
|-----------|---------------------------------------------------------------------|--------|-------|----|-------|
| 210135477 | <b>30S ribosomal protein S10 (RpsJ)</b>                             | 59.24  | 13.46 | 2  | 1.583 |
| 15611308  | Outer membrane protein                                              | 37.53  | 11.25 | 7  | 1.582 |
| 317013104 | <b>50S ribosomal protein L23 (RplW)</b>                             | 253.69 | 49.46 | 5  | 1.573 |
| 217034319 | Hypothetical protein HP9810_491g12                                  | 154.44 | 29.52 | 6  | 1.570 |
| 107836496 | <b>50S ribosomal protein L21 (RplU)</b>                             | 128.73 | 20.19 | 3  | 1.556 |
| 15645018  | Unnamed protein product                                             | 158.50 | 29.52 | 6  | 1.556 |
| 15611904  | Hydrogenase expression/formation protein                            | 88.21  | 10.33 | 5  | 1.555 |
| 315586121 | Conserved hypothetical protein                                      | 87.74  | 13.14 | 4  | 1.552 |
| 15611134  | Urease accessory protein                                            | 129.96 | 23.62 | 5  | 1.550 |
| 207093235 | <b>30S ribosomal protein S7 (RpsG)</b>                              | 217.42 | 32.03 | 6  | 1.550 |
| 148717246 | <b>Sialic acid-binding adhesin (SabA)</b>                           | 35.62  | 2.15  | 2  | 1.538 |
| 188143129 | <b>30S ribosomal protein S9 (RpsI)</b>                              | 239.38 | 37.98 | 6  | 1.537 |
| 15645683  | Unnamed protein product                                             | 56.31  | 8.86  | 7  | 1.536 |
| 188143477 | <b>Serine protease DO (HtrA)</b>                                    | 544.56 | 30.04 | 14 | 1.535 |
| 317010118 | Ferredoxin-like protein                                             | 38.57  | 4.37  | 2  | 1.535 |
| 217034426 | Hypothetical protein HP9810_11g8                                    | 87.29  | 9.25  | 6  | 1.533 |
| 107837687 | <b>Ubiquinol cytochrome c oxidoreductase, 2Fe-2S subunit (PetA)</b> | 69.89  | 10.18 | 2  | 1.533 |
| 15644814  | Unnamed protein product                                             | 92.97  | 17.98 | 5  | 1.530 |
| 189011844 | Heat shock protein                                                  | 241.29 | 53.93 | 6  | 1.521 |
| 15645986  | <b>(3R)-hydroxymyristoyl-ACP dehydratase (FabZ)</b>                 | 55.73  | 16.35 | 3  | 1.519 |
| 317014518 | <b>F0F1 ATP synthase subunit beta (AtpD)</b>                        | 574.90 | 22.60 | 10 | 1.516 |
| 207108692 | <b>2-dehydro-3-deoxyphosphooctonate aldolase (KdsA)</b>             | 87.11  | 9.55  | 2  | 1.515 |
| 298736833 | Bifunctional methionine sulfoxide reductase A/B                     | 152.90 | 18.82 | 9  | 1.504 |
| 15646161  | <b>30S ribosomal protein S2 (RpsB)</b>                              | 109.01 | 18.18 | 7  | 1.500 |

<sup>a</sup> Proteins that were categorized by KEGG pathway analysis are shown in bold.

<sup>b</sup> The 117/115 iTRAQ ratios represent the results for three independent repeats.

**Supplemental Table II Gender effect on the odds ratio of an increased number of recognized antigens**

| Recognized antigens |                            | Number positive (%) |           |                            | OR (95% CI), <i>p</i> value <sup>b</sup> |                           |
|---------------------|----------------------------|---------------------|-----------|----------------------------|------------------------------------------|---------------------------|
| Male                | Antigens                   | GC (n=48)           | DU (n=56) | non-GC <sup>a</sup> (n=69) | GC vs. DU                                | GC vs. non-GC             |
|                     | None                       | 5 (10.4)            | 34 (60.7) | 43 (62.3)                  | 0.08 (0.03- 0.22), <0.0001               | 0.07 (0.02-0.20), <0.0001 |
|                     | Any one antigen            | 14 (29.2)           | 15 (26.8) | 18 (26.1)                  | 1.13 (0.48-2.66), 0.79                   | 1.17 (0.51-2.65), 0.71    |
|                     | Two of the four antigens   | 12 (25.0)           | 6 (10.7)  | 6 (8.7)                    | 2.78 (0.95-8.09), 0.05                   | 3.5 (1.21-10.12), 0.02    |
|                     | Three of the four antigens | 10 (20.8)           | 1 (1.8)   | 2 (2.9)                    | 14.47 (1.78-117.82), 0.0016              | 8.82 (1.84-42.35), 0.0022 |
|                     | All four antigens          | 7 (14.6)            | 0 (0)     | 0 (0)                      | ND <sup>c</sup>                          | ND                        |
| Female              | Antigens                   | GC (n=28)           | DU (n=24) | non-GC (n=31)              | GC vs. DU                                | GC vs. non-GC             |
|                     | None                       | 5 (17.9)            | 17 (70.8) | 22 (71.0)                  | 0.09 (0.02-0.33), 0.0001                 | 0.09 (0.03-0.31), <0.0001 |
|                     | Any one antigen            | 5 (17.9)            | 3 (12.5)  | 4 (12.9)                   | 1.52 (0.32-7.16), 0.71                   | 1.47 (0.35-6.12), 0.72    |
|                     | Two of the four antigens   | 5 (17.9)            | 2 (8.3)   | 3 (9.7)                    | 2.39 (0.42-13.64), 0.43                  | 2.03 (0.44-9.41), 0.46    |
|                     | Three of the four antigens | 11 (39.3)           | 2 (8.3)   | 2 (6.5)                    | 7.12 (1.39-36.48), 0.01                  | 9.38 (1.85-47.47), 0.0024 |
|                     | All four antigens          | 2 (7.1)             | 0 (0)     | 0 (0)                      | ND                                       | ND                        |

<sup>a</sup>The non-GC group consisted of normal subjects, gastritis patients with or without *H. pylori* infection, and DU patients.

<sup>b</sup>*p* value calculated using the Chi-squared test.

<sup>c</sup>ND, not determined.

**Supplemental Table III. Age effect on the odds ratio of an increased number of recognized antigens**

| Recognized antigens |                            | Number positive (%) |           |                            | OR (95% CI), <i>p</i> value <sup>b</sup> |                             |
|---------------------|----------------------------|---------------------|-----------|----------------------------|------------------------------------------|-----------------------------|
| <50                 | Antigens                   | GC (n=11)           | DU (n=31) | non-GC <sup>a</sup> (n=48) | GC vs. DU                                | GC vs. non-GC               |
|                     | None                       | 1 (9.1)             | 17 (54.8) | 29 (60.4)                  | 0.08 (0.01-0.72), 0.01                   | 0.07 (0.01-0.55), 0.0021    |
|                     | Any one antigen            | 4 (36.4)            | 9 (29.0)  | 13 (27.1)                  | 1.40 (0.33-5.97), 0.71                   | 1.54 (0.39-6.14), 0.71      |
|                     | Two of the four antigens   | 2 (18.2)            | 3 (9.7)   | 3 (6.3)                    | 2.07 (0.30-14.44), 0.59                  | 3.33 (0.49-22.90), 0.23     |
|                     | Three of the four antigens | 3 (27.3)            | 2 (6.5)   | 3 (6.3)                    | 5.44 (0.77-38.33), 0.10                  | 5.63 (0.96-32.97), 0.07     |
|                     | All four antigens          | 1 (9.1)             | 0 (0.0)   | 0 (0)                      | ND <sup>c</sup>                          | ND                          |
| ≥50                 |                            | GC (n=65)           | DU (n=49) | non-GC (n=52)              | GC vs. DU                                | GC vs. non-GC               |
|                     | None                       | 9 (13.8)            | 34 (69.4) | 36 (69.2)                  | 0.07 (0.03-0.18), <0.0001                | 0.07 (0.03-0.18), <0.0001   |
|                     | Any one antigen            | 15 (23.1)           | 9 (18.4)  | 9 (17.3)                   | 1.33 (0.53-3.36), 0.54                   | 1.43 (0.57-3.60), 0.44      |
|                     | Two of the four antigens   | 15 (23.1)           | 5 (10.2)  | 6 (11.5)                   | 2.64 (0.89-7.85), 0.07                   | 2.3 (0.82-6.43), 0.11       |
|                     | Three of the four antigens | 18 (27.7)           | 1 (2.0)   | 1 (1.9)                    | 18.38 (2.36-143.30), 0.0003              | 19.53 (2.51-152.08), 0.0002 |
|                     | All four antigens          | 8 (12.3)            | 0 (0)     | 0 (0)                      | ND                                       | ND                          |

<sup>a</sup>The non-GC group consisted of normal subjects, gastritis patients with or without *H. pylori* infection, and DU patients.

<sup>b</sup>*p* value calculated using the Chi-squared test.

<sup>c</sup>ND, not determined.



**Supplemental Table IV.** Clinical features of the gastric cancer patients

| <b>Feature</b>           | <b>No. (%)</b>  |
|--------------------------|-----------------|
| <b>Total</b>             | <b>76 (100)</b> |
| <b>Gender</b>            |                 |
| <b>Male</b>              | <b>48 (63)</b>  |
| <b>Female</b>            | <b>28 (37)</b>  |
| <b>Age (yr)</b>          |                 |
| <b>Average</b>           | <b>64.2</b>     |
| <b>Range</b>             | <b>23-87</b>    |
| <b>SD</b>                | <b>13.3</b>     |
| <b>Staging</b>           |                 |
| <b>EGC<sup>a</sup></b>   | <b>23 (30)</b>  |
| <b>AGC<sup>b</sup></b>   | <b>53 (70)</b>  |
| <b>Histological type</b> |                 |
| <b>Diffuse</b>           | <b>27 (36)</b>  |
| <b>Non-diffuse</b>       | <b>49 (64)</b>  |
| <b>Tumor location</b>    |                 |
| <b>Antrum</b>            | <b>43 (57)</b>  |
| <b>Non-antrum</b>        | <b>33 (43)</b>  |

<sup>a</sup>Early gastric cancer with cancer cell invasion confined to the mucosa or submucosa.

<sup>b</sup>Advanced gastric cancer with cancer cell invasion beyond the muscularis propria.

**Supplemental Table V.** Primer sequences used for constructs, RT-PCR, and genotyping

| Gene                              | Primer sequence (F : forward, R : reverse )    |
|-----------------------------------|------------------------------------------------|
| AlpA                              | F : 5'-GGATCCGAATCCTGCGCTAGCATAAGTTA-3'        |
|                                   | R : 5'-CTCGAGCTCGAGGAATGAATACCCATAAGA-3'       |
| OipA                              | F : 5'-GGATCCGAATCCCACGCTGAAAGG-3'             |
|                                   | R : 5'-CTCGAGCTCGAGATAAACGCTCAC-3'             |
|                                   | F1: 5'-CATGCTGAAAGGAACGGATTTTAT-3'             |
|                                   | R1: 5'-ATAAACGCTCACCACTCTTTTATA-3'             |
| BabA                              | F : 5'-GGATCCGAATCCGAAGACGACGGCTTTTACATGAGC-3' |
|                                   | R : 5'-CTCGAGCTCGAGAAATACACGCTATAGAGCCTGCGG-3' |
|                                   | F1: 5'-GAAGACGACGGCTTTTACATGAGC-3'             |
|                                   | R1: 5'-AAATACACGCTATAGAGCCTGCGG-3'             |
|                                   | F2: 5'-CGGGACGGTGAATGTAACCT-3'                 |
|                                   | R2: 5'-ATTTTCCTGAAGGGGTACG-3'                  |
| SabA                              | F : 5'-GGATCCGAATCCGAAGACAACGGCTTTTTTGT-3'     |
|                                   | R : 5'-CTCGAGCTCGAGTTAATAAGCAAACACATAATTGAG-3' |
|                                   | F1: 5'-GAAGACAACGGCTTTTTTGT-3'                 |
|                                   | R1: 5'-TTAATAAGCAAACACATAATTGAG-3'             |
|                                   | F2: 5'-TGCTCAGGAATTGAAAAC TG-3'                |
| R2: 5'-CCGTTCAAAGCGCCGTTATTGTT-3' |                                                |
| UreB                              | F : 5'-ATGAAAAAGATTAGCAGAAAAGAATAT-3'          |
|                                   | R : 5'-CTAGAAAATGCTAAAGAGTTGCGCCA-3'           |

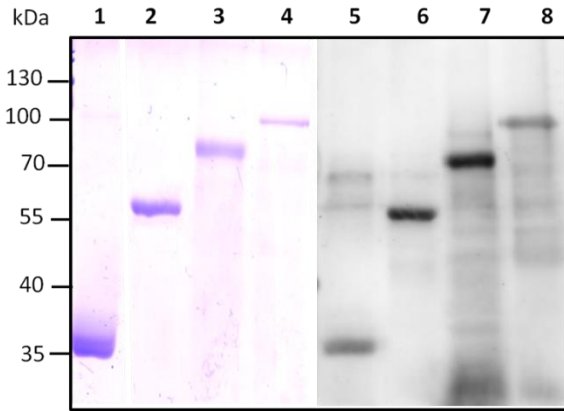

**Supplemental Figure 1.** Purity of the recombinant proteins and reactivity with a GC patient serum.

Purified recombinant OipA (lanes 1 and 5), AlpA (lanes 2 and 6), SabA (lanes 3 and 7), and BabA (lanes 4 and 8) were electrophoresed on a 10 % SDS-PAGE and either stained with Coomassie Blue (lanes 1-4) or transferred to a PVDF membrane and immunoblotted with serum from a GC patient serum (lanes 5-8).

```

* * * * *
GC1 1>ATGAAAAAGCTCTCTTACTAATCTCTCTCTCTCGTCTGGCTCCATGCTGAAAGGAACGGATTTTATTTGGTAAATTTTCTCAGAGGGAGGT-TAT--GAGTACAAGACA--GCGGT-TCGGCAAAAAGCTTCAGCAGAACCGCCCTCAATCAAGCGATCAATAACGCAAAAAATTCATTATTCGCCGA-AC>193
GC2 1>ATGAAAAAGCTCTCTTACTAATCTCTCTCTCTCGTCTGGCTCCATGCTGAAAGGAACGGATTTTATTTGGTAAATTTTCTCAGAGGGAGGT-TAT--GAGTACAAGACA--GCGGT-TCGGCAAAAAGCTTCAGCAGAACCGCCCTCAATCAAGCGATCAATAACGCAAAAAATTCATTATTCGCCGA-AC>193
GC3 1>ATGAAAAAGCTCTCTTACTAATCTCTCTCTCTCGTCTGGCTCCATGCTGAAAGGAACGGATTTTATTTGGTAAATTTTCTCAGAGGGAGGT-TAT--GAGTACAAGACA--GCGGT-TCGGCAAAAAGCTTCAGCAGAACCGCCCTCAATCAAGCGATCAATAACGCAAAAAATTCATTATTCGCCGA-AC>193
GC4 1>ATGAAAAAGCTCTCTTACTAATCTCTCTCTCTCGTCTGGCTCCATGCTGAAAGGAACGGATTTTATTTGGTAAATTTTCTCAGAGGGAGGT-TAT--GAGTACAAGACA--GCGGT-TCGGCAAAAAGCTTCAGCAGAACCGCCCTCAATCAAGCGATCAATAACGCAAAAAATTCATTATTCGCCGA-AC>193
GC5 1>ATGAAAAAGCTCTCTTACTAATCTCTCTCTCTCGTCTGGCTCCATGCTGAAAGGAACGGATTTTATTTGGTAAATTTTCTCAGAGGGAGGT-TAT--GAGTACAAGACA--GCGGT-TCGGCAAAAAGCTTCAGCAGAACCGCCCTCAATCAAGCGATCAATAACGCAAAAAATTCATTATTCGCCGA-AC>194

* * * * *
194>AAAAACAAAAGCCATAAGAGATGCAAAAACGCCTTAAATGAAGTGAAGAACTCAACAAAATCGTAACCGATTTCGAGGAAATGGTGGTTCGGGGCTTTTTAATGAATCAGCTTTGGGTATAAATATTTTTGGGTAAAAAAGGATTAAGGTTTAGGCACTCTCTTTTTTCGGTTACCAACTTGGTGGC>393
194>AAAAACAAAAGCCATAAGAGATGCAAAAACGCCTTAAATGAAGTGAAGAACTCAACAAAATCGTAACCGATTTCGAGGAAATGGTGGTTCGGGGCTTTTTAATGAATCAGCTTTGGGTATAAATATTTTTGGGTAAAAAAGGATTAAGGTTTAGGCACTCTCTTTTTTCGGTTACCAACTTGGTGGC>393
194>AAAAACAAAAGCCATAAGAGATGCAAAAACGCCTTAAATGAAGTGAAGAACTCAACAAAATCGTAACCGATTTCGAGGAAATGGTGGTTCGGGGCTTTTTAATGAATCAGCTTTGGGTATAAATATTTTTGGGTAAAAAAGGATTAAGGTTTAGGCACTCTCTTTTTTCGGTTACCAACTTGGTGGC>393
194>AAAAACAAAAGCCATAAGAGATGCAAAAACGCCTTAAATGAAGTGAAGAACTCAACAAAATCGTAACCGATTTCGAGGAAATGGTGGTTCGGGGCTTTTTAATGAATCAGCTTTGGGTATAAATATTTTTGGGTAAAAAAGGATTAAGGTTTAGGCACTCTCTTTTTTCGGTTACCAACTTGGTGGC>393
195>AA[red]CAAAGCCATAAGAGATGCAAAAACGCCTTAAATGAAGTGAAGAACTCAACAAAATCGTCAACGATTTCGAGGAAATGGTGGTTCGGGGCTTTTTAATGAATCAGCTTTGGGTATAAATATTTTTGGGTAAAAAAGGATTAAGGTTTAGGCACTCTCTTTTTTCGGTTACCAACTTGGTGGC>393

* * * * *
394>GTTGGTTCGTTCCTGGCAGCGGTT-TAATCGCTTTTTTACCCTATGGTTCAATACGGATTTCGTCATTAATGGACTAACGATAAGCGAGCGTCCCAAGAAGATGTTGAACGAAGGTTAAAAGGGCTCTCTATATTTACAAAAGATATGACCGCAGAACCTAGACGCTAATACATTAATAAAGTATCAAGGCACA>592
394>GTTGGTTCGTTCCTGGCAGCGGTT-TAATCGCTTTTTTACCCTATGGTTCAATACGGATTTCGTCATTAATGGACTAACGATAAGCGAGCGTCCCAAGAAGATGTTGAACGAAGGTTAAAAGGGCTCTCTATATTTACAAAAGATATGACCGCAGAACCTAGACGCTAATACATTAATAAAGTATCAAGGCACA>592
394>GTTGGTTCGTTCCTGGCAGCGGTT-TAATCGCTTTTTTACCCTATGGTTCAATACGGATTTCGTCATTAATGGACTAACGATAAGCGAGCGTCCCAAGAAGATGTTGAACGAAGGTTAAAAGGGCTCTCTATATTTACAAAAGATATGACCGCAGAACCTAGACGCTAATACATTAATAAAGTATCAAGGCACA>592
394>GTTGGTTCGTTCCTGGCAGCGGTT-TAATCGCTTTTTTACCCTATGGTTCAATACGGATTTCGTCATTAATGGACTAACGATAAGCGAGCGTCCCAAGAAGATGTTGAACGAAGGTTAAAAGGGCTCTCTATATTTACAAAAGATATGACCGCAGAACCTAGACGCTAATACATTAATAAAGTATCAAGGCACA>592
394>GTTGGTTCGTTCCTGGCAGCGGTT-TAATCGCTTTTTTACCCTATGGTTCAATACGGATTTCGTCATTAATGGACTAACGATAAGCGAGCGTCCCAAGAAGATGTTGAACGAAGGTTAAAAGGGCTCTCTATATTTACAAAAGATATGACCGCAGAACCTAGACGCTAATACATTAATAAAGTATCAAGGCACA>592

* * * * *
593>TATTTAGAAAATCTTCAGGGCTTGTGATTGGCATGGATATAGGGGCTAGCACTTGGTTGCAAGTAAACAATCTCACCCCTTCAATCAAGTAAAGGCCACACAGATTTTCAGTTACAAGGAAAATTTGGCGTTCGTTATAATAGCGATGAATACGATATGATCGCTATGGCGATGAAAATATATCTTGGGGTTCAGT>792
593>TATTTAGAAAATCTTCAGGGCTTGTGATTGGCATGGATATAGGGGCTAGCACTTGGTTGCAAGTAAACAATCTCACCCCTTCAATCAAGTAAAGGCCACACAGATTTTCAGTTACAAGGAAAATTTGGCGTTCGTTATAATAGCGATGAATACGATATGATCGCTATGGCGATGAAAATATATCTTGGGGTTCAGT>792
593>TATTTAGAAAATCTTCAGGGCTTGTGATTGGCATGGATATAGGGGCTAGCACTTGGTTGCAAGTAAACAATCTCACCCCTTCAATCAAGTAAAGGCCACACAGATTTTCAGTTACAAGGAAAATTTGGCGTTCGTTATAATAGCGATGAATACGATATGATCGCTATGGCGATGAAAATATATCTTGGGGTTCAGT>792
593>TATTTAGAAAATCTTCAGGGCTTGTGATTGGCATGGATATAGGGGCTAGCACTTGGTTGCAAGTAAACAATCTCACCCCTTCAATCAAGTAAAGGCCACACAGATTTTCAGTTACAAGGAAAATTTGGCGTTCGTTATAATAGCGATGAATACGATATGATCGCTATGGCGATGAAAATATATCTTGGGGTTCAGT>792

* * * * *
793>GTTGAATTAGGGGTTAAAGTGCCGCTTTTTAAAGTCAATTACTATGAGC-GAGA--TGC---GGGGATAAAATGGAATATAAAAAGTGGTGAGCGTTTATCTCAACTATACATATAACTTTAAAAACAACATTA-->924
793>GTTGAATTAGGGGTTAAAGTGCCGCTTTTTAAAGTCAATTACTATGAGC-GA-GA--TGC[red]GGGGATAAAATGGAATATAAAAAGTGGTGAGCGTTTATCTCAACTATACATATAACTTTAAAAACAACATTA-->924
793>GTTGAATTAGGGGTTAAAGTGCCGCTTTTTAAAGTCAATTACTATGAGC-GA-GA--TGC---GGGGATAAAATGGAATATAAAAAGTGGTGAGCGTTTATCTCAACTATACATATAACTTTAAAAACAACATTA-->924
793>GTTGAATTAGGGGTTAAAGTGCCGCTTTTTAAAGTCAATTACTATGAGC-GA-GA-GA--TGC---GGGGATAAAATGGAATATAAAAAGTGGTGAGCGTTTATCTCAACTATACATATAACTTTAAAAACAACATTA-->924
793>GTTGAATTAGGGGTTAAAGTGCCGCTTTTTAAAGTCAATTACTATGAGC-GA-GA--TGC---GGGGATAAAATGGAATATAAAAAGTGGTGAGCGTTTATCTCAACTATACATATAACTTTAAAAACAACATTA-->924

```

**Supplemental Figure 2.** Genotyping of the *OipA* gene in the 5 GC strains. The sequence of *OipA* gene in the clinical GC strains GC1-GC5 are compared. The nucleotides in red indicated difference and the “-“ in sequences denoted a gap.



GC1 1>GAAGACAACGGCTTTTTGTGAGCGCGGCTACAAATCGCGGAAGCGGTGCAAAATGTCAAAAGCACCAGGCAATGAAAACCTTGAACGCAAAATACGAGCAATTAACACAGTATTAATCAAGTGGCTTCGTGAAGCAAGCATTCAAACGCCAACACATTGAGCTGGTCAATAGCTCTTTAAACGATTTAAA>200  
GC2 1>GAAGACAACGGCTTTTTGTGAGCGCGGCTACAAATCGCGGAAGCGGTGCAAAATGTCAAAAGCACCAGGCAATGAAAACCTTGAACGCAAAATACGAGCAATTAACACAGTATTAATCAAGTGGCTTCGTGAAGCAAGCATTCAAACGCCAACACATTGAGCTGGTCAATAGCTCTTTAAACGATTTAAA>200  
GC3 1>GAAGACAACGGCTTTTTGTGAGCGCGGCTACAAATCGCGGAAGCGGTGCAAAATGTCAAAAGCACCAGGCAATGAAAACCTTGAACGCAAAATACGAGCAATTAACACAGTATTAATCAAGTGGCTTCGTGAAGCAAGCATTCAAACGCCAACACATTGAGCTGGTCAATAGCTCTTTAAACGATTTAAA>197  
GC4 1>GAAGACAACGGCTTTTTGTGAGCGCGGCTACAAATCGCGGAGCGGTGCAAAATGTCAAAAGCACCAGGCAATGAAAACCTTGAACGCAAAATACGAGCAATTAACACAGTATTAATCAAGTGGCTTCGTGAAGCAAGCATTCAAACGCCAACACATTGAGCTGGTCAATAGCTCTTTAAACGATTTAAA>200  
GC5 1>GAAGACAACGGCTTTTTGTGAGCGCGGCTACAAATCGCGGAAGCGGTGCAAAATGTCAAAAGCACCAGGCAATGAAAACCTTGAACGCAAAATACGAGCAATTAACACAGTATTAATCAAGTGGCTTCGTGAAGCAAGCATTCAAACGCCAACACATTGAGCTGGTCAATAGCTCTTTAAACGATTTAAA>200

201>AAGCTTTACCGAAAAAATACTATAACGACACCACCAATCGCCCATCTTTAACGCTGTGCAAGCCGTATCACTTCGGTATTTGGGTTTTGGAGTCTTTATGCGGGGAACACTTCTACTTTTTTTGGTGGTAAATAGGATACTAAACACCCGCTAGTGTCAATGTTAACCTCTCTTTCAAACGATATTCGAGAAGTCT>400  
201>AAGCTTTACCGAAAAAATACTATAACGACACCACCAATCGCCCATCTTTAACGCTGTGCAAGCCGTATCACTTCGGTATTTGGGTTTTGGAGTCTTTATGCGGGGAACACTTCTACTTTTTTTGGTGGTAAATAGGATACTAAACACCCGCTAGTGTCAATGTTAACCTCTCTTTCAAACGATATTCGAGAAGTCT>400  
198>AAGCTTTACCGAAAAAATACTATAACGACACCACCAATCGCCCATCTTTAACGCTGTGCAAGCCGTATCACTTCGGTATTTGGGTTTTGGAGTCTTTATGCGGGGAACACTTCTACTTTTTTTGGTGGTAAATAGGATACTAAACACCCGCTAGTGTCAATGTTAACCTCTCTTTCAAACGATATTCGAGAAGTCT>397  
201>AAGCTTTACCGAAAAAATACTATAACGACACCACCAATCGCCCATCTTTAACGCTGTGCAAGCCGTATCACTTCGGTATTTGGGTTTTGGAGTCTTTATGCGGGGAACACTTCTACTTTTTTTGGTGGTAAATAGGATACTAAACACCCGCTAGTGTCAATGTTAACCTCTCTTTCAAACGATATTCGAGAAGTCT>400  
201>AAGCTTTACCGAAAAAATACTATAACGACACCACCAATCGCCCATCTTTAACGCTGTGCAAGCCGTATCACTTCGGTATTTGGGTTTTGGAGTCTTTATGCGGGGAACACTTCTACTTTTTTTGGTGGTAAATAGGATACTAAACACCCGCTAGTGTCAATGTTAACCTCTCTTTCAAACGATATTCGAGAAGTCT>400

401>CAGGAATTTGAAAACCTGCGCTATGGAGCAAAACCTTACG-CGAAGATGAAAAAATCTGCTGAAGATCTCAAGCAGCTCAACAAAACCTTGCCTAAAGCGAACAATCTTTGGCTTTATCAGGATGACCCGCAACAAGGCCAACCCCAACTCAACCGTAAGCAAGCTCTTGAACGGCGCAACAGCTTA-TGG>598  
401>CAGGAATTTGAAAACCTGCGCTATGGAGCAAAACCTTACG-CGAAGATGAAAAAATCTGCTGAAGATCTCAAGCAGCTCAACAAAACCTTGCCTAAAGCGAACAATCTTTGGCTTTATCAGGATGACCCGCAACAAGGCCAACCCCAACTCAACCGTAAGCAAGCTCTTGAACGGCGCAACAGCTTA-TGG>598  
398>CAGGAATTTGAAAACCTGCGCTATGGAGCAAAACCTTACG-CGAAGATGAAAAAATCTGCTGAAGATCTCAAGCAGCTCAACAAAACCTTGCCTAAAGCGAACAATCTTTGGCTTTATCAGGATGACCCGCAACAAGGCCAACCCCAACTCAACCGTAAGCAAGCTCTTGAACGGCGCAACAGCTTA-TGG>598  
401>CAGGAATTTGAAAACCTGCGCTATGGAGCAAAACCTTACG-CGAAGATGAAAAAATCTGCTGAAGATCTCAAGCAGCTCAACAAAACCTTGCCTAAAGCGAACAATCTTTGGCTTTATCAGGATGACCCGCAACAAGGCCAACCCCAACTCAACCGTAAGCAAGCTCTTGAACGGCGCAACAGCTTA-TGG>598  
401>CAGGAATTTGAAAACCTGCGCTATGGAGCAAAACCTTACG-CGAAGATGAAAAAATCTGCTGAAGATCTCAAGCAGCTCAACAAAACCTTGCCTAAAGCGAACAATCTTTGGCTTTATCAGGATGACCCGCAACAAGGCCAACCCCAACTCAACCGTAAGCAAGCTCTTGAACGGCGCAACAGCTTA-TGG>598

599>ATTTAATCGCAAACTAGGACTGCTATGATGTGAAAAATATCGTCATCAGTGGCGTTTCAAACGGCTCGGGTGTATACATCCACTGGTTACCAACGCACATATGCGGTGTTAAACAACATCAAGCGGATGATACCTATCTTGAACGAGCGGTACGCTTTCTCAAAATAACAACAGCCTATCTAGTCAGTTGCAA>798  
599>ATTTAATCGCAAACTAGGACTGCTATGATGTGAAAAATATCGTCATCAGTGGCGTTTCAAACGGCTCGGGTGTATACATCCACTGGTTACCAACGCACATATGCGGTGTTAAACAACATCAAGCGGATGATACCTATCTTGAACGAGCGGTACGCTTTCTCAAAATAACAACAGCCTATCTAGTCAGTTGCAA>798  
599>ATTTAATCGCAAACTAGGACTGCTATGATGTGAAAAATATCGTCATCAGTGGCGTTTCAAACGGCTCGGGTGTATACATCCACTGGTTACCAACGCACATATGCGGTGTTAAACAACATCAAGCGGATGATACCTATCTTGAACGAGCGGTACGCTTTCTCAAAATAACAACAGCCTATCTAGTCAGTTGCAA>798  
599>ATTTAATCGCAAACTAGGACTGCTATGATGTGAAAAATATCGTCATCAGTGGCGTTTCAAACGGCTCGGGTGTATACATCCACTGGTTACCAACGCACATATGCGGTGTTAAACAACATCAAGCGGATGATACCTATCTTGAACGAGCGGTACGCTTTCTCAAAATAACAACAGCCTATCTAGTCAGTTGCAA>798

799>GCTCAAGCTACAGGATCTCAAACAAACCTGAAATCGTAAAGACATCTACAATCGCTTTAAACCAAAGCAAGTCACTCTTATGCAAAAGATATTTCAACCTCTTTAATTCATCCCTAAAGATCAGTATAAATATCTAGAGAAGCCATTTGAAAATACCAATCGGGTCAAACCTCTA-CTAAGCCTTACA>997  
799>GCTCAAGCTACAGGATCTCAAACAAACCTGAAATCGTAAAGACATCTACAATCGCTTTAAACCAAAGCAAGTCACTCTTATGCAAAAGATATTTCAACCTCTTTAATTCATCCCTAAAGATCAGTATAAATATCTAGAGAAGCCATTTGAAAATACCAATCGGGTCAAACCTCTA-CTAAGCCTTACA>997  
796>GCTCAAGCTACAGGATCTCAAACAAACCTGAAATCGTAAAGACATCTACAATCGCTTTAAACCAAAGCAAGTCACTCTTATGCAAAAGATATTTCAACCTCTTTAATTCATCCCTAAAGATCAGTATAAATATCTAGAGAAGCCATTTGAAAATACCAATCGGGTCAAACCTCTA-CTAAGCCTTACA>996  
799>GCTCAAGCTACAGGATCTCAAACAAACCTGAAATCGTAAAGACATCTACAATCGCTTTAAACCAAAGCAAGTCACTCTTATGCAAAAGATATTTCAACCTCTTTAATTCATCCCTAAAGATCAGTATAAATATCTAGAGAAGCCATTTGAAAATACCAATCGGGTCAAACCTCTA-CTAAGCCTTACA>997  
799>GCTCAAGCTACAGGATCTCAAACAAACCTGAAATCGTAAAGACATCTACAATCGCTTTAAACCAAAGCAAGTCACTCTTATGCAAAAGATATTTCAACCTCTTTAATTCATCCCTAAAGATCAGTATAAATATCTAGAGAAGCCATTTGAAAATACCAATCGGGTCAAACCTCTA-CTAAGCCTTACA>997

998>GACAAGA--GGTGAATTTGAA-T-AAGAAATTCAGACAGTTC-AAAGAAATGTGAGTTATTTGGCAATCGGTTGGAT-TGGCTTTAAGCGTGGTAAAGATGTTTATAACCTAAAATCAAACAGAGATTTAGCCGCTATAGCAACGCTACGAATTTGAGCCAAGAGATTTCTCACTCCCATACAATCAA>1191  
998>GACAAGA--GGTGAATTTGAA-T-AAGAAATTCAGACAGTTC-AAAGAAATGTGAGTTATTTGGCAATCGGTTGGAT-TGGCTTTAAGCGTGGTAAAGATGTTTATAACCTAAAATCAAACAGAGATTTAGCCGCTATAGCAACGCTACGAATTTGAGCCAAGAGATTTCTCACTCCCATACAATCAA>1191  
995>GACAAGA--GGTGAATTTGAA-T-AAGAAATTCAGACAGTTC-AAAGAAATGTGAGTTATTTGGCAATCGGTTGGAT-TGGCTTTAAGCGTGGTAAAGATGTTTATAACCTAAAATCAAACAGAGATTTAGCCGCTATAGCAACGCTACGAATTTGAGCCAAGAGATTTCTCACTCCCATACAATCAA>1188  
998>GACAAGA--GGTGAATTTGAA-T-AAGAAATTCAGACAGTTC-AAAGAAATGTGAGTTATTTGGCAATCGGTTGGAT-TGGCTTTAAGCGTGGTAAAGATGTTTATAACCTAAAATCAAACAGAGATTTAGCCGCTATAGCAACGCTACGAATTTGAGCCAAGAGATTTCTCACTCCCATACAATCAA>1191  
998>GACAAGA--GGTGAATTTGAA-T-AAGAAATTCAGACAGTTC-AAAGAAATGTGAGTTATTTGGCAATCGGTTGGAT-TGGCTTTAAGCGTGGTAAAGATGTTTATAACCTAAAATCAAACAGAGATTTAGCCGCTATAGCAACGCTACGAATTTGAGCCAAGAGATTTCTCACTCCCATACAATCAA>1191

1192>GTCAATACAAAAGACATTTGTACACACTACCTTATGATAAAAACGCTCCAGCAGCGGGCCAATAACAATACCAAATCAACCAAGAGCAAGCATCAAATCTTTCTCAAGCTTTAGCGGCGATGAGCAATAACCCCTTTAAAAATATAGGAATGATAGCTCTCAAAAGCAATAACGGCGCATTTGAAATGGCTGGCGTGAAGT>1391  
1192>GTCAATACAAAAGACATTTGTACACACTACCTTATGATAAAAACGCTCCAGCAGCGGGCCAATAACAATACCAAATCAACCAAGAGCAAGCATCAAATCTTTCTCAAGCTTTAGCGGCGATGAGCAATAACCCCTTTAAAAATATAGGAATGATAGCTCTCAAAAGCAATAACGGCGCATTTGAAATGGCTGGCGTGAAGT>1391  
1192>GTCAATACAAAAGACATTTGTACACACTACCTTATGATAAAAACGCTCCAGCAGCGGGCCAATAACAATACCAAATCAACCAAGAGCAAGCATCAAATCTTTCTCAAGCTTTAGCGGCGATGAGCAATAACCCCTTTAAAAATATAGGAATGATAGCTCTCAAAAGCAATAACGGCGCATTTGAAATGGCTGGCGTGAAGT>1388  
1192>GTCAATACAAAAGACATTTGTACACACTACCTTATGATAAAAACGCTCCAGCAGCGGGCCAATAACAATACCAAATCAACCAAGAGCAAGCATCAAATCTTTCTCAAGCTTTAGCGGCGATGAGCAATAACCCCTTTAAAAATATAGGAATGATAGCTCTCAAAAGCAATAACGGCGCATTTGAAATGGCTGGCGTGAAGT>1391  
1192>GTCAATACAAAAGACATTTGTACACACTACCTTATGATAAAAACGCTCCAGCAGCGGGCCAATAACAATACCAAATCAACCAAGAGCAAGCATCAAATCTTTCTCAAGCTTTAGCGGCGATGAGCAATAACCCCTTTAAAAATATAGGAATGATAGCTCTCAAAAGCAATAACGGCGCATTTGAAATGGCTGGCGTGAAGT>1391

1392>GGGCTATAAGCAATCTTTGGCGAAAACAAAGACGGGGATTAAGGTATTATGGCTTCTTTGATTACAACCACGGCTATATCAAAATCAAGCTTTTTAATCTTCTCTGACATATGGACTTATGGCGGTGGGAGCGATTGTTAGTGAATTTTATCAACGATAGCGTTACAAGAAAGAACCAACAGCTTCTGTGGGTC>1591  
1392>GGGCTATAAGCAATCTTTGGCGAAAACAAAGACGGGGATTAAGGTATTATGGCTTCTTTGATTACAACCACGGCTATATCAAAATCAAGCTTTTTAATCTTCTCTGACATATGGACTTATGGCGGTGGGAGCGATTGTTAGTGAATTTTATCAACGATAGCGTTACAAGAAAGAACCAACAGCTTCTGTGGGTC>1591  
1392>GGGCTATAAGCAATCTTTGGCGAAAACAAAGACGGGGATTAAGGTATTATGGCTTCTTTGATTACAACCACGGCTATATCAAAATCAAGCTTTTTAATCTTCTCTGACATATGGACTTATGGCGGTGGGAGCGATTGTTAGTGAATTTTATCAACGATAGCGTTACAAGAAAGAACCAACAGCTTCTGTGGGTC>1588  
1392>GGGCTATAAGCAATCTTTGGCGAAAACAAAGACGGGGATTAAGGTATTATGGCTTCTTTGATTACAACCACGGCTATATCAAAATCAAGCTTTTTAATCTTCTCTGACATATGGACTTATGGCGGTGGGAGCGATTGTTAGTGAATTTTATCAACGATAGCGTTACAAGAAAGAACCAACAGCTTCTGTGGGTC>1591  
1392>GGGCTATAAGCAATCTTTGGCGAAAACAAAGACGGGGATTAAGGTATTATGGCTTCTTTGATTACAACCACGGCTATATCAAAATCAAGCTTTTTAATCTTCTCTGACATATGGACTTATGGCGGTGGGAGCGATTGTTAGTGAATTTTATCAACGATAGCGTTACAAGAAAGAACCAACAGCTTCTGTGGGTC>1591

1592>TATTTGGTGGTATCCAACAGCAGGACTACATGGCTTAATCTCAATATGTAATTTAACCGCATTAACAATCTTACAGGGGAAAGTCAACTTCCAATTTCCAATTTCTGTTCAATCTCGGTTTGAAGAACGATCTCGCTACAGCTAAGAAGAAGACAGCGAACATTCGCCAACACATGGCATAGAATTTGGGC>1791  
1592>TATTTGGTGGTATCCAACAGCAGGACTACATGGCTTAATCTCAATATGTAATTTAACCGCATTAACAATCTTACAGGGGAAAGTCAACTTCCAATTTCCAATTTCTGTTCAATCTCGGTTTGAAGAACGATCTCGCTACAGCTAAGAAGAAGACAGCGAACATTCGCCAACACATGGCATAGAATTTGGGC>1791  
1592>TATTTGGTGGTATCCAACAGCAGGACTACATGGCTTAATCTCAATATGTAATTTAACCGCATTAACAATCTTACAGGGGAAAGTCAACTTCCAATTTCCAATTTCTGTTCAATCTCGGTTTGAAGAACGATCTCGCTACAGCTAAGAAGAAGACAGCGAACATTCGCCAACACATGGCATAGAATTTGGGC>1791  
1592>TATTTGGTGGTATCCAACAGCAGGACTACATGGCTTAATCTCAATATGTAATTTAACCGCATTAACAATCTTACAGGGGAAAGTCAACTTCCAATTTCCAATTTCTGTTCAATCTCGGTTTGAAGAACGATCTCGCTACAGCTAAGAAGAAGACAGCGAACATTCGCCAACACATGGCATAGAATTTGGGC>1791  
1592>TATTTGGTGGTATCCAACAGCAGGACTACATGGCTTAATCTCAATATGTAATTTAACCGCATTAACAATCTTACAGGGGAAAGTCAACTTCCAATTTCCAATTTCTGTTCAATCTCGGTTTGAAGAACGATCTCGCTACAGCTAAGAAGAAGACAGCGAACATTCGCCAACACATGGCATAGAATTTGGGC>1791

1792>ATTAATAATCCCTACCACCAACAGCAATTAATCTTTCTAGGCGCTAAGCTAGAATACAGAAGGCTCTATAGCGGTGATCTCAATATGTTGTTGCTTATTA>1896  
1792>ATTAATAATCCCTACCACCAACAGCAATTAATCTTTCTAGGCGCTAAGCTAGAATACAGAAGGCTCTATAGCGGTGATCTCAATATGTTGTTGCTTATTA>1896  
1792>ATTAATAATCCCTACCACCAACAGCAATTAATCTTTCTAGGCGCTAAGCTAGAATACAGAAGGCTCTATAGCGGTGATCTCAATATGTTGTTGCTTATTA>1893  
1792>ATTAATAATCCCTACCACCAACAGCAATTAATCTTTCTAGGCGCTAAGCTAGAATACAGAAGGCTCTATAGCGGTGATCTCAATATGTTGTTGCTTATTA>1896  
1792>ATTAATAATCCCTACCACCAACAGCAATTAATCTTTCTAGGCGCTAAGCTAGAATACAGAAGGCTCTATAGCGGTGATCTCAATATGTTGTTGCTTATTA>1896

**Supplemental Figure 4.** Genotyping of the SabA gene in the 5 GC strains. The sequence of SabA gene in the clinical GC strains GC1-GC5 are compared. The nucleotides in red indicated difference and the “-” in sequences denoted a gap.

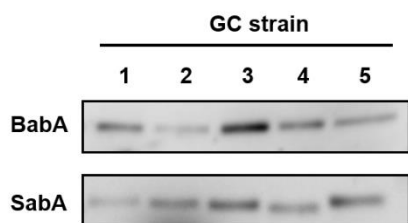

**Supplemental Figure 5.** BabA and SabA protein expression of the 5 GC strains. Protein extracts from 5

GC-derived *H. pylori* samples were prepared and protein levels of BabA and SabA were examined by

Western blotting. The data shown are representative of the results obtained in three independent

experiments, all gels and blots were run in the same experimental conditions.

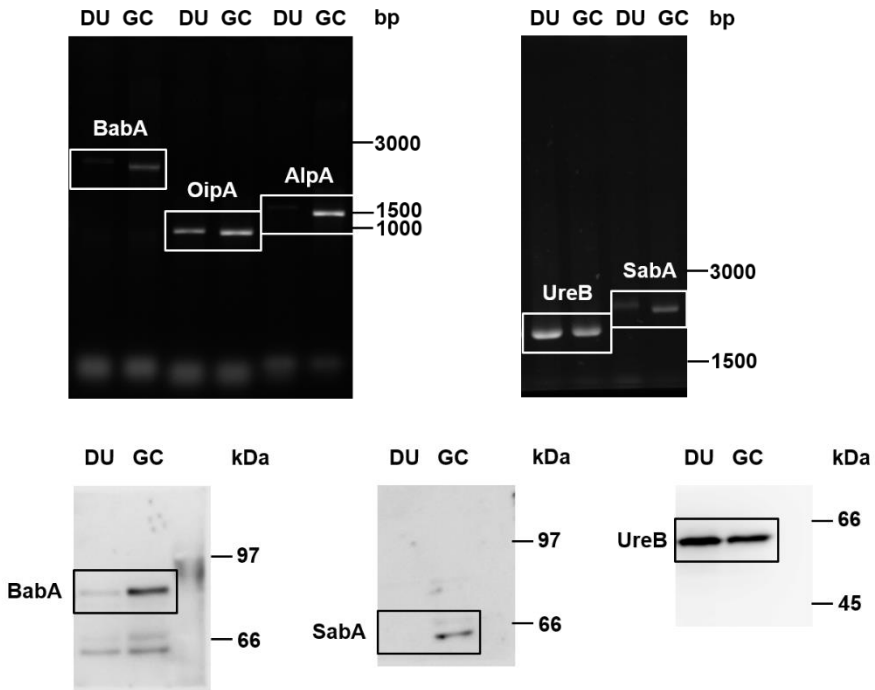

**Supplemental Figure 6.** Uncropped gels and blots of Figure 2B.
